# Supplementary material for: Biocides and techniques for their encapsulation: a review
Source: Royal Society of Chemistry journal article supplement (doi:10.1039/d1sm01114f), 2022-01-01
Supplement: d1sm01114f1.pdf [file d1sm01114f1.pdf]

**Table 1** - Examples of common biocides according to their chemical groups, common application, solubility, and limitations. (Supplementary material)

| <i>General group</i>                             | <i>Applications</i>                                                                                                                                                                             | <i>Limitations</i>                                                                                                                                          | <i>Examples</i>                                     | <i>Physical state and Octanol/water partition coefficient as log Pow</i> |
|--------------------------------------------------|-------------------------------------------------------------------------------------------------------------------------------------------------------------------------------------------------|-------------------------------------------------------------------------------------------------------------------------------------------------------------|-----------------------------------------------------|--------------------------------------------------------------------------|
| <i>Alcohols</i>                                  | Disinfectants, antiseptics, antimycotics, deodorants, and preservatives <sup>1,2</sup>                                                                                                          |                                                                                                                                                             | Ethanol                                             | Polar liquid;<br>Non-polar liquid                                        |
|                                                  |                                                                                                                                                                                                 |                                                                                                                                                             | isopropanol<br>etc.                                 |                                                                          |
| <i>Aldehydes</i>                                 | Disinfection and sterilization in many areas such as in the leather tanning industry, poultry industry, cosmetic field, micro-biological field, food industry and medical area <sup>1,3,4</sup> | Usually commercially obtained as an acidic solution and it is activated (made alkaline) before the use; incompatible with strong oxidizers and strong bases | Glutaraldehyde (pentanedial)                        | Liquid<br>-0.22                                                          |
|                                                  |                                                                                                                                                                                                 | Less active under acid conditions                                                                                                                           | Formaldehyde (methanal)                             | Flammable gas (often stored in aqueous solution)<br>0.35                 |
|                                                  |                                                                                                                                                                                                 | Less active under acid conditions                                                                                                                           | Ortho-phthalaldehyde (benzene-1,2-dicarboxaldehyde) | Solid<br>0.99 @ 30°C                                                     |
| <i>Amphoteric surfactants</i>                    | Commonly available household cleaning/hygiene agents <sup>5</sup>                                                                                                                               | Less active under acid conditions. Ideal: Neutral/alkaline conditions                                                                                       | Cocamidopropyl betaine                              | Liquid<br>-1.28 to -3.63 @ 25°C                                          |
|                                                  |                                                                                                                                                                                                 |                                                                                                                                                             | Dodecyl-di (aminoethyl)-glycine                     |                                                                          |
|                                                  |                                                                                                                                                                                                 |                                                                                                                                                             | N-Alkyl aminopropyl glycine                         |                                                                          |
| <i>Anionic surfactants</i>                       | Commonly available household cleaning/hygiene agents <sup>5</sup>                                                                                                                               | Effective only at low pH;<br>Neutralized by detergent residues;<br>Corrosive to soft metals, mild steel                                                     | Sodium dodecyl sulfate                              |                                                                          |
|                                                  |                                                                                                                                                                                                 |                                                                                                                                                             | alkylbenzene sulfonate (LAS)                        |                                                                          |
|                                                  |                                                                                                                                                                                                 |                                                                                                                                                             | Sodium lauryl sulfate (SLS)                         | Solid<br>1.6                                                             |
| <i>Cationic surfactants</i>                      | Disinfectants; highly effective for the inactivation of SARS-CoV-2 <sup>6</sup>                                                                                                                 | Neutralized by certain surfactants. Ideal: Neutral/alkaline conditions                                                                                      | Sodium dodecyl benzene sulfonate (SDBS)             | 0.45                                                                     |
|                                                  |                                                                                                                                                                                                 |                                                                                                                                                             | benzalkonium chloride                               | 0.96-2.93<br>(C8-C12)                                                    |
|                                                  |                                                                                                                                                                                                 |                                                                                                                                                             | Methyldimethyl ammonium chloride                    |                                                                          |
| <i>Halogens (or halogen releasing compounds)</i> | Food industries and sanitization of equipment; water treatment <sup>7-12</sup>                                                                                                                  | Acid conditions;<br>Vapor phase corrosion                                                                                                                   | Chlorine                                            | Gas (stable active halogen liquid; chlorine tablets)                     |
|                                                  |                                                                                                                                                                                                 |                                                                                                                                                             | Sodium hypochlorite (SH)                            | liquid<br>- 3.42 @ 20°C                                                  |
|                                                  |                                                                                                                                                                                                 |                                                                                                                                                             | Chlorine dioxide (CD)                               | Gas (tablets)<br>-3.22                                                   |
|                                                  |                                                                                                                                                                                                 | Stabilized form slower and less                                                                                                                             |                                                     |                                                                          |

|                             |                                                                                                                                                                      |                                                                                                                                                         |                                                            |                       |
|-----------------------------|----------------------------------------------------------------------------------------------------------------------------------------------------------------------|---------------------------------------------------------------------------------------------------------------------------------------------------------|------------------------------------------------------------|-----------------------|
|                             |                                                                                                                                                                      | active under alkaline/neutral conditions                                                                                                                | Sodium dichloroisocyanurate (NaDCC)                        | Solid<br>-0.0056      |
|                             |                                                                                                                                                                      |                                                                                                                                                         | Sodium bromide                                             | water-soluble solid   |
|                             |                                                                                                                                                                      |                                                                                                                                                         | Bromine-chlorine-dimethylhydantoin ( <i>BCDMH</i> )        | Solid<br>0.32-0.40    |
|                             |                                                                                                                                                                      | Corrosive in presence of chlorine ions; Rapid decomposition at high temperatures; rapid decomposition by metals, organic matter. Ideal: Acid conditions | Hydrogen peroxide                                          | Liquid<br>-1.36       |
| <i>Peroxygens</i>           | Cleaning; antiseptics; air, water, and surface disinfection (including device and food surfaces) <sup>1,9,11,13</sup>                                                |                                                                                                                                                         | Peracetic acid                                             | Liquid<br>-0.52       |
|                             | Preservative for industrial emulsions, adhesives, polishes, glues, household products, paper products, cutting oils <sup>1,14,15</sup>                               |                                                                                                                                                         | 1,2-benzisothiazolin-3-one (BIT)                           | Solid<br>0.7 @ 20°C   |
| <i>Isothiazolinones</i>     |                                                                                                                                                                      |                                                                                                                                                         | 2-methyl-4-isothiazolin-3-one (MIT)                        | Solid<br>-0.49        |
|                             |                                                                                                                                                                      |                                                                                                                                                         | 5-Chloro-2-methyl-4-isothiazolin-3-one (CMIT)              | Solid<br>0.53         |
|                             |                                                                                                                                                                      |                                                                                                                                                         | 2-n-Octyl-4-isothiazolin-3-one (OIT)                       | Liquid<br>>3.1 (20°C) |
|                             |                                                                                                                                                                      |                                                                                                                                                         | 4,5-dichloro-2-octyl-4-isothiazolin-3-one (DCOIT)          | Solid<br>4.68         |
|                             | Disinfectants (including aerial ones), antiseptics, surgical scrubs, toilet soaps, cosmetics, textiles and cutting oils, herbicides and fungicide <sup>1,16,17</sup> |                                                                                                                                                         | 2,4-dichlorophenoxyacetic acid (2,4-D)                     | Solid<br>2.81         |
| <i>Phenolics</i>            |                                                                                                                                                                      | Some surfactants can "over-solubilize" them reducing their effective availability                                                                       | 2,4-Dichlorophenol                                         | Solid<br>3.06         |
|                             |                                                                                                                                                                      |                                                                                                                                                         | 2,4,5-trichlorophenol                                      | Solid<br>3.72         |
|                             |                                                                                                                                                                      |                                                                                                                                                         | 5-chloro-2-(2,4-dichlorophenoxy)phenol (triclosan)         | Solid<br>4.8          |
|                             |                                                                                                                                                                      |                                                                                                                                                         | Hexachlorophene [2,2'-methylenebis(3,4,6-trichlorophenol)] | Solid<br>7.54         |
| <i>Polymeric biguanides</i> | Disinfectant and antiseptic                                                                                                                                          | Incompatible with anionic surfactants                                                                                                                   | 1,6-bis(4-chloro-phenyl biguanide)hexane (chlorhexidine)   | Solid<br>-1.1         |
|                             |                                                                                                                                                                      |                                                                                                                                                         | Alexidine                                                  | Water soluble solid   |
